# Supplementary material
Source: PubMed Central journal article supplement (PMC4068582)
Supplement: AAC.02481-13_zac007143045so1.pdf [file AAC.02481-13_zac007143045so1.pdf]

## Supporting information

**Title:** 4-Amino bis-pyridinium derivatives as novel antileishmanial agents

**Authors:** Verónica Gómez-Pérez<sup>1</sup>, José Ignacio Manzano<sup>2</sup>, Raquel García-Hernández<sup>2</sup>, Santiago Castanys<sup>2§</sup>, Joaquín M<sup>a</sup> Campos Rosa<sup>1§</sup>, Francisco Gamarro<sup>2§\*</sup>.

<sup>1</sup>Departamento de Química Farmacéutica y Orgánica, Facultad de Farmacia. Universidad de Granada, c/ Campus de Cartuja s/n, 18071 Granada, Spain.

<sup>2</sup>Instituto de Parasitología y Biomedicina “López-Neyra”, IPBLN-CSIC, Parque Tecnológico de Ciencias de la Salud, Avda. del Conocimiento s/n, 18016 Armilla, Granada, Spain.

\* **Corresponding author.** Phone: +34 958 181667; Fax: +34 958 181632; E-mail:

**Running title:** Bis-pyridinium compounds as antileishmanial agents

40  
41

**Table S1. Structure of bis-cationic compounds**

| 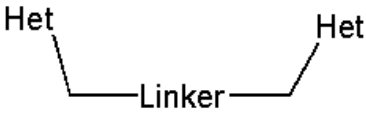 |                                                                                     |                                                                                      |
|------------------------------------------------------------------------------------|-------------------------------------------------------------------------------------|--------------------------------------------------------------------------------------|
| Compound                                                                           | Het                                                                                 | Linker                                                                               |
| VGP-106                                                                            |    |    |
| VGP-114                                                                            |    |    |
| VGP-118                                                                            |    |    |
| VGP-130                                                                            |    |    |
| VGP-138                                                                            |    |    |
| VGP-146                                                                            |   |   |
| VGP-150                                                                            |  |  |
| VGP-162                                                                            |  |  |
| VGP-174                                                                            |  |  |
| VGP-182                                                                            |  |  |

42  
43  
44  
45  
46  
47  
48  
49  
50  
51  
52  
53  
54  
55
